# Supplementary material for: Orchestrating segment anything models to accelerate segmentation annotation on agricultural image datasets
Source: Research Square preprint supplement (doi:10.21203/rs.3.rs-7606794/v1), 2025-10-03
Supplement: Supplementary file 1 [file e5d7e3245b56108242139c0e.pdf]

# Supplementary material

**Title:** Orchestrating segment anything models to accelerate segmentation annotation on agricultural image datasets

**Authors:** Leon H. Oehme <sup>a, \*</sup>, Jonas Boysen <sup>b</sup>, Zhangkai Wu <sup>b</sup>, Anthony Stein <sup>b</sup>, Joachim Müller <sup>a</sup>

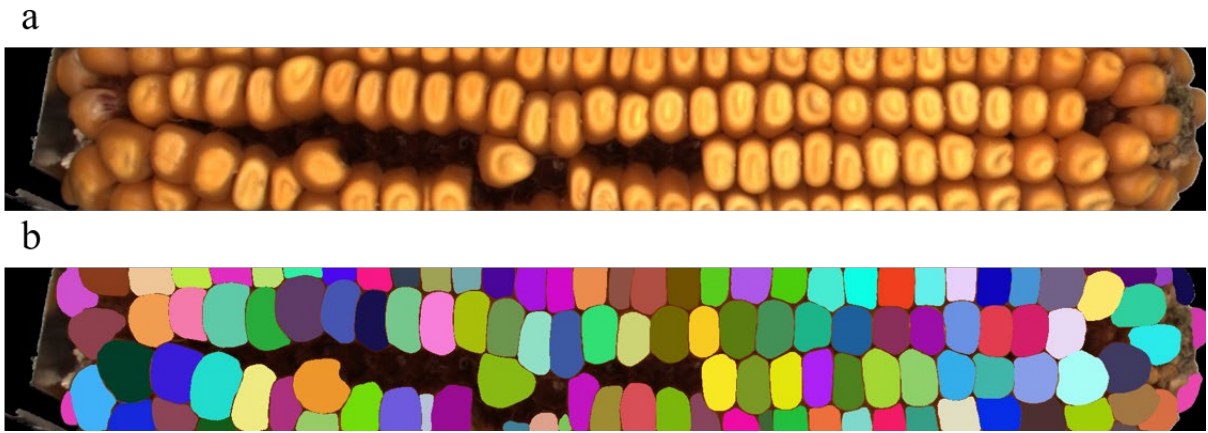

**Supplementary Fig. S1.** Example of maize ear images used for hyperparameter optimization of automatic mask generators (AMG). (a) Original RGB image. (b) Previously annotated maize kernel instances highlighted by random colours.

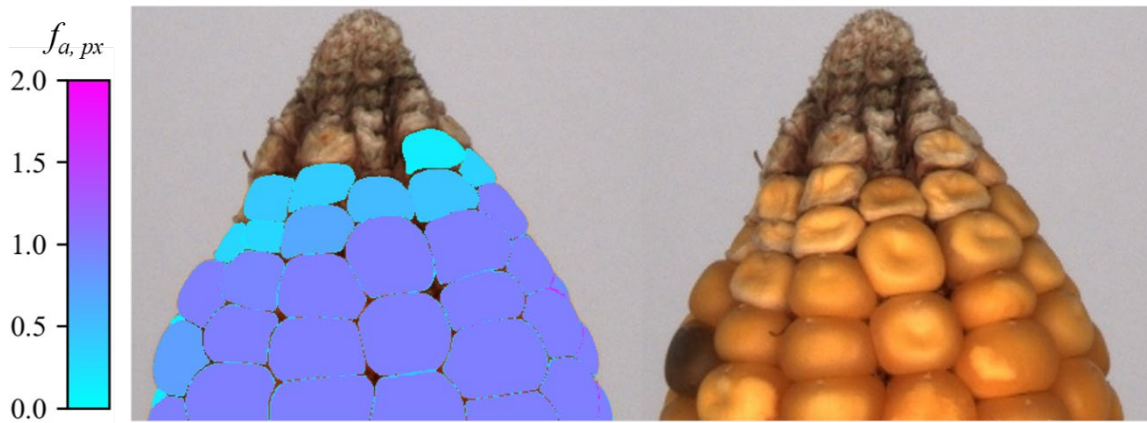

**Supplementary Fig. S2.** Annotation decisions on selected image crop from the leftmost ear in Fig. 5. The colormap on the left side depicts the frequency a pixel has been assigned to a mask relative to the number of annotation rounds ( $f_{a, px}$ ). Only pixels assigned to a mask more than once are included. The right side shows the original RGB image.
